# Supplementary material for: Knockdown of CENPF inhibits the progression of lung adenocarcinoma mediated by ERβ2/5 pathway
Source: publisher site journal article supplement (doi:10.18632/aging.202303), 2021-01-10
Supplement: Supplementary file [file aging-v13i2-202303-supplementary-material-SD1.pdf]

## SUPPLEMENTARY FIGURES

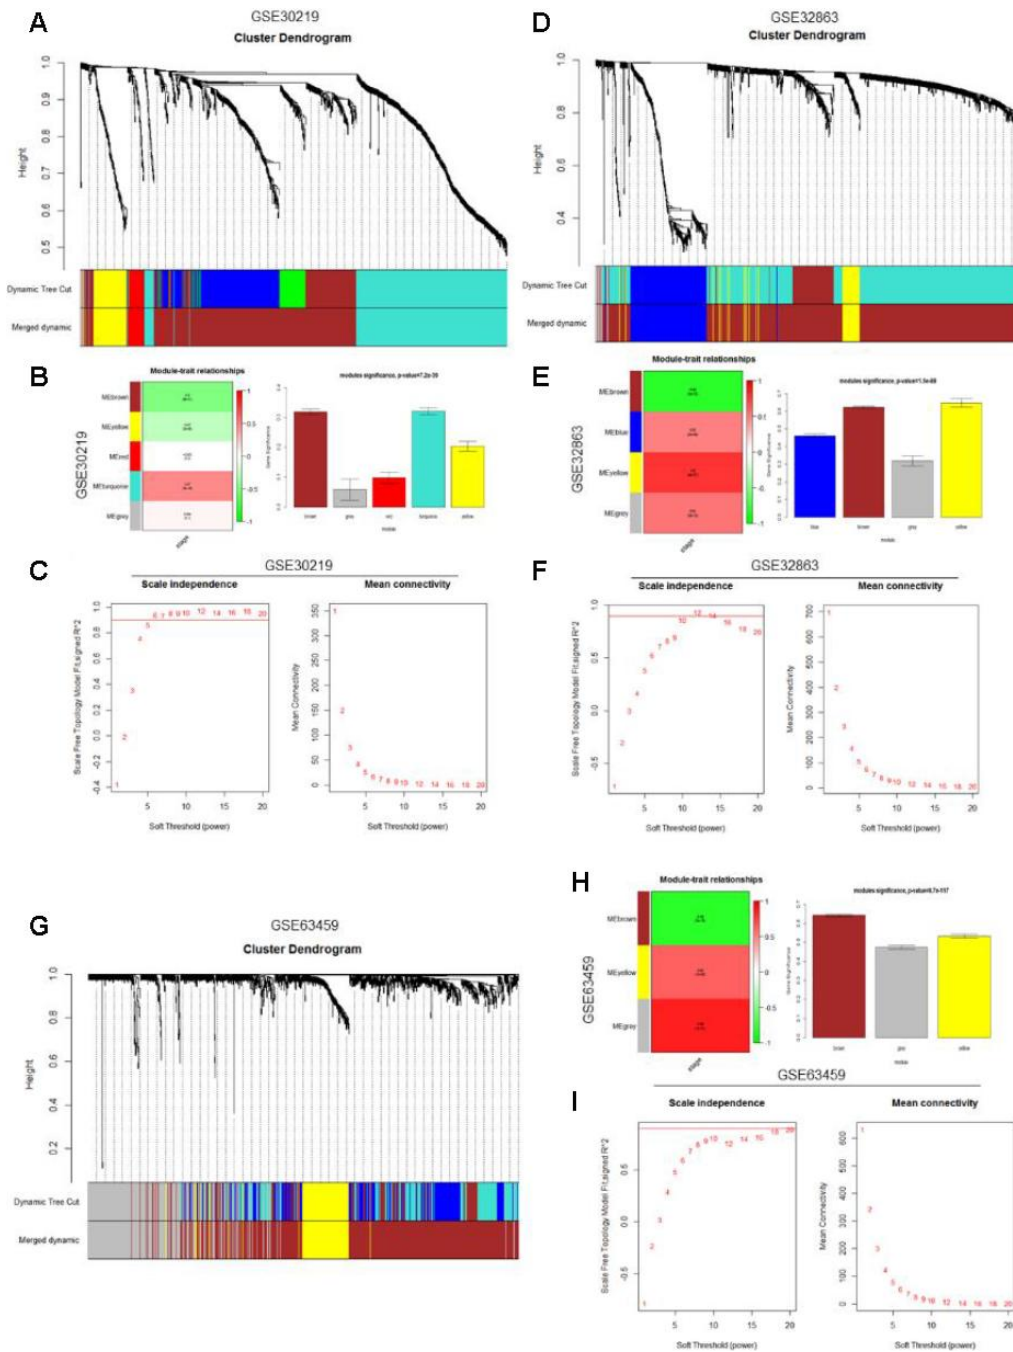

**Supplementary Figure 1. WGCNA analysis and determination of the CENPF gene.** (A, D, G) Dendrogram of all differentially expressed genes clustered based on a dissimilarity measure (1-TOM) (GSE30219, GSE32863, GSE63459). (B, E, H) Heat maps and distribution of differential genes for different modules related to NSCLC staging (GSE30219) and LUAD staging (GSE32863, GSE63459). (C, F, I) Analysis of the scale-free fit index for various soft-thresholding power ( $\beta$ ) and analysis of the mean connectivity for various soft-thresholding power (GSE30219, GSE32863, GSE63459).

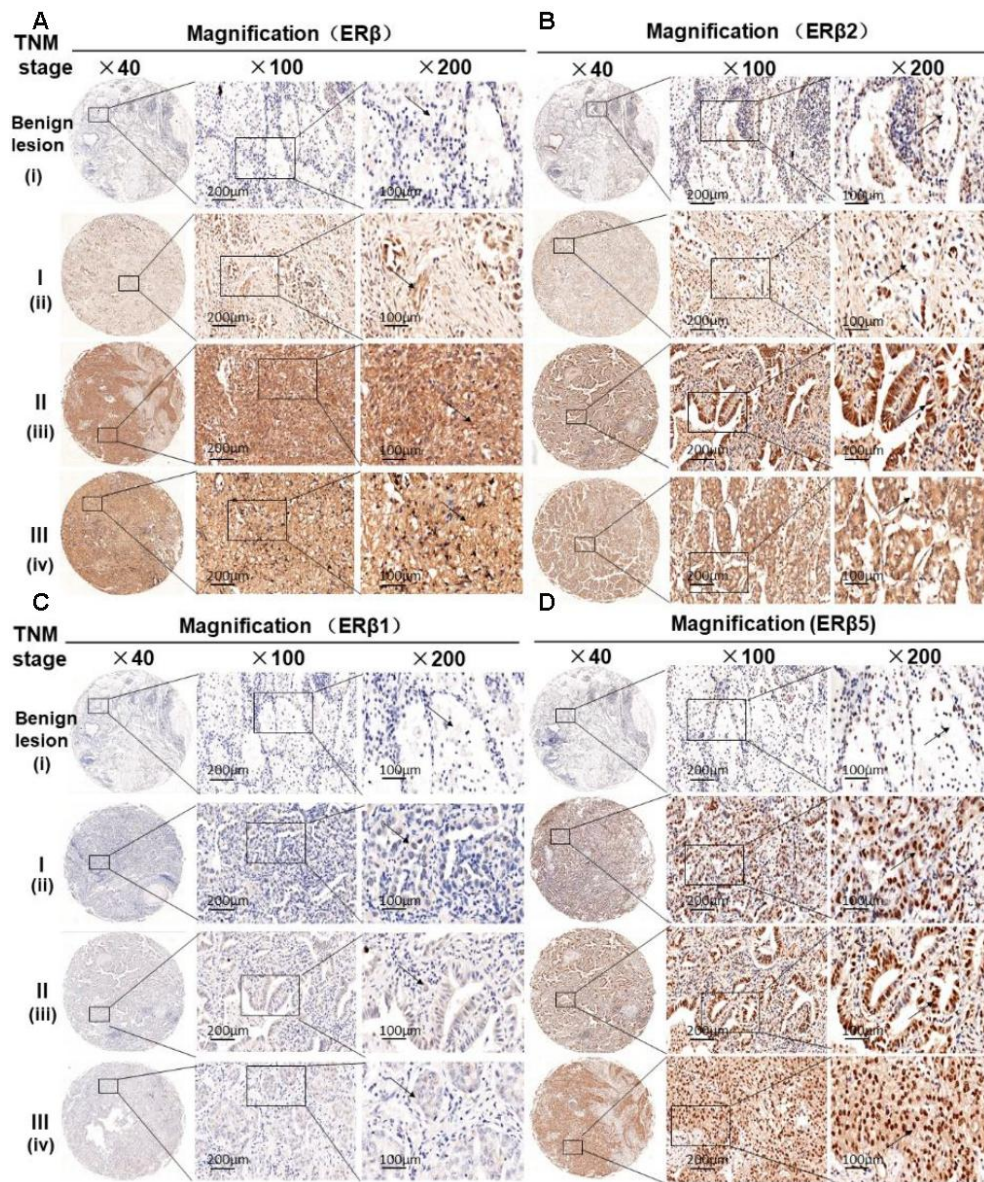

**Supplementary Figure 2.** (A–D) Expression of ERβ, ERβ1, ERβ2 and ERβ5 in benign lung lesions (i) and different TNM staging of LUAD (ii=I stage, iii=II stage, iv=III stage). The magnification of each slice is 40×, 100×, 200× in order.

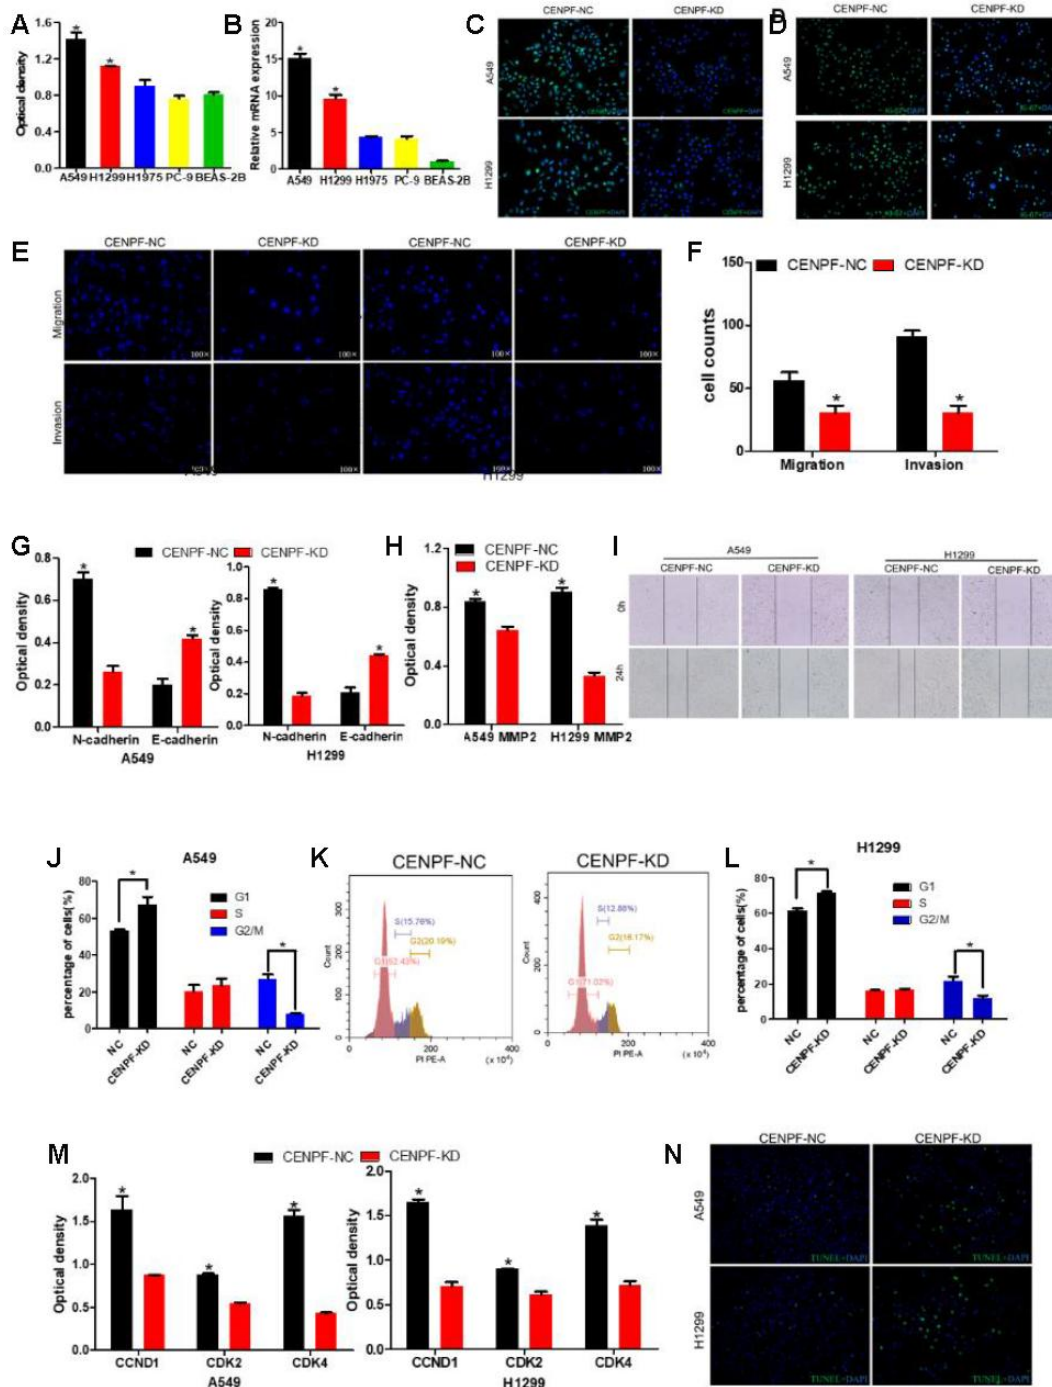

**Supplementary Figure 3. Knockdown of CENPF inhibits the biological effects of LUAD cells.** (A) The protein level of CENPF in A549 and H1299 cell lines were higher than in normal cell lines BEAS-2B and other LUAD cells. GAPDH served as the internal control. \* $P < 0.05$  vs other cells. (B) mRNA expression of CENPF in different cell lines. \* $P < 0.05$  vs other cells. (C) Representative cellular immunofluorescence images after transfection of CENPF (200 $\times$ ). Green stands for CENPF and blue stands for DAPI. (D) Representative Ki67 staining (green) shows cell proliferation of LUAD cells after CENPF-NC or KD treatment (200 $\times$ ). The nuclei were counterstained with DAPI (blue). (E, F) Migration assays and invasion assays revealed that CENPF-KD decreased cell migration and invasion abilities of A549 and H1299. (G, H) Corresponding gray value analysis showed that the related protein E-cadherin was significantly increased ( $P=0.009$ , Figure 4F), and N-cadherin and MMP2 were significantly decreased when compared with NC group ( $P=0.004$ , 0.012) of N-cadherin, E-cadherin and MMP2 in A549 and H1299 cells. (I) Representative scratched pictures of A549 and H1299 cells. (J–L) Percentage of CENPF-KD cells H1299 at different stages of the cell cycle (G1, S and G2/M) and corresponding quantified histograms of A549 and H1299. (M) Corresponding gray value analysis showed that the expression of CCND1, CDK2 and CDK4 was significantly lowered in CENPF-KD group ( $P=0.022$ , 0.001, 0.002). (N) Representative TUNEL staining (green) shows (200 $\times$ ). P values were calculated with two-tailed unpaired Student's t-test, or one-way analysis of variance.



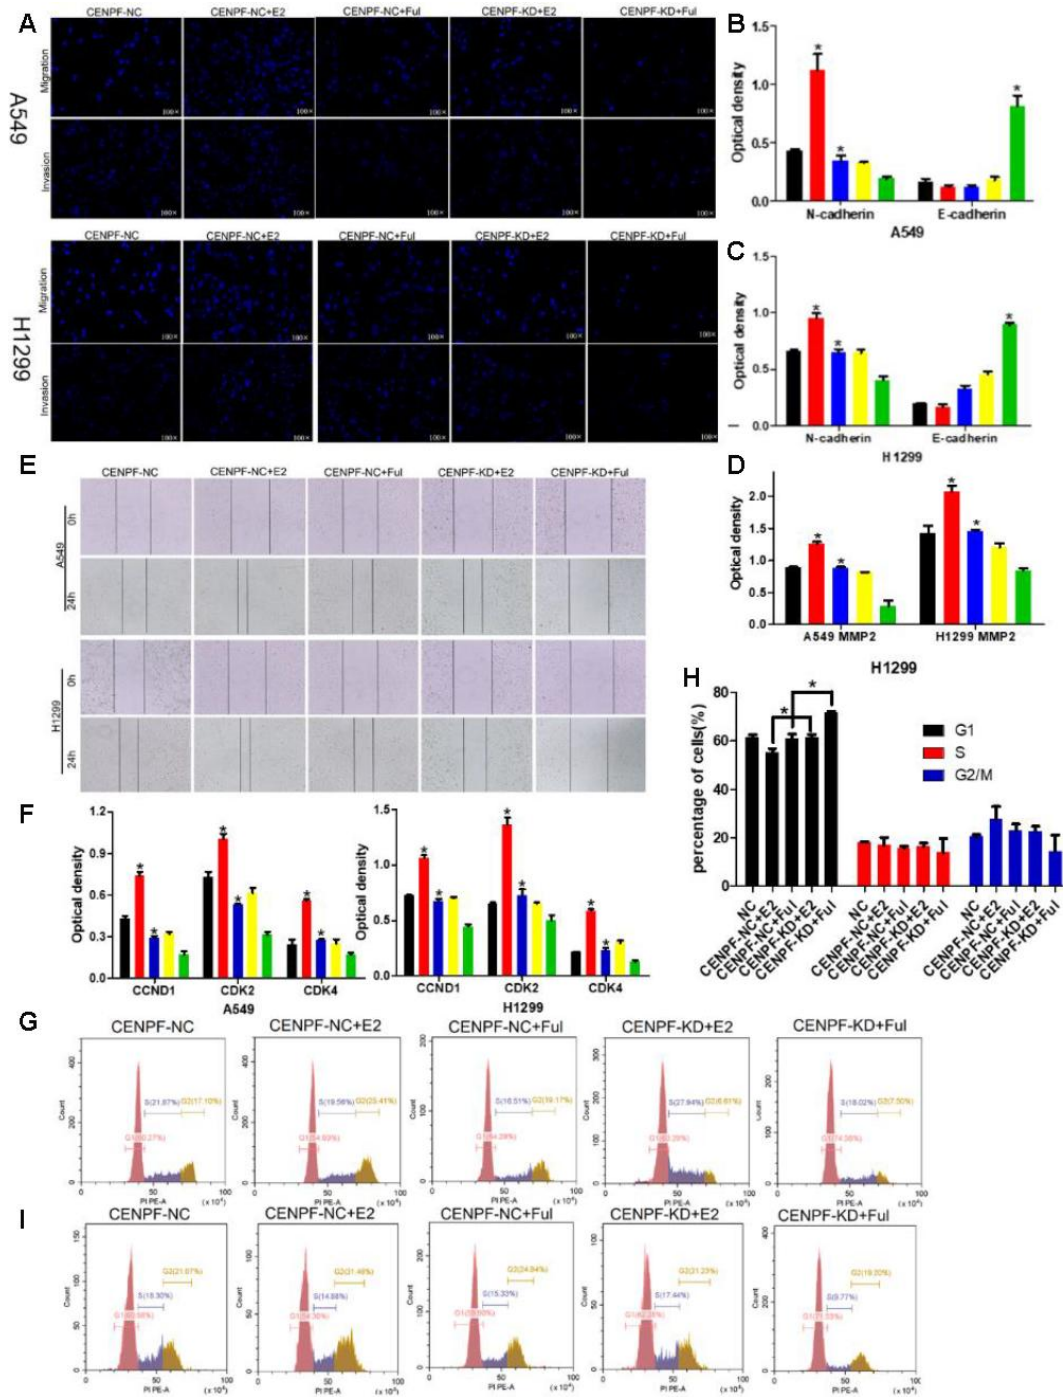

**Supplementary Figure 4. Knockdown of CENPF inhibits proliferation, invasion and migration of LUAD cells via the ER $\beta$ 2/5 pathway.** (A) Migration and invasion pictures of A549 and H1299 cells. (B–D) Corresponding quantified histograms of MMP2, N-cadherin and E-cadherin in A549 and H1299 cells. (E) Representative scratched images of A549 and H1299 cells. (F) Corresponding quantified histograms of CCND1, CDK2 and CDK4 in A549 and H1299. \*P < 0.05. (G–I) Percentage of the A549 cells and H1299 cells at different stages of the cell cycle (G1, S and G2/M) and corresponding quantified histograms. P values were calculated with two-tailed unpaired Student's t-test, or one-way analysis of variance.

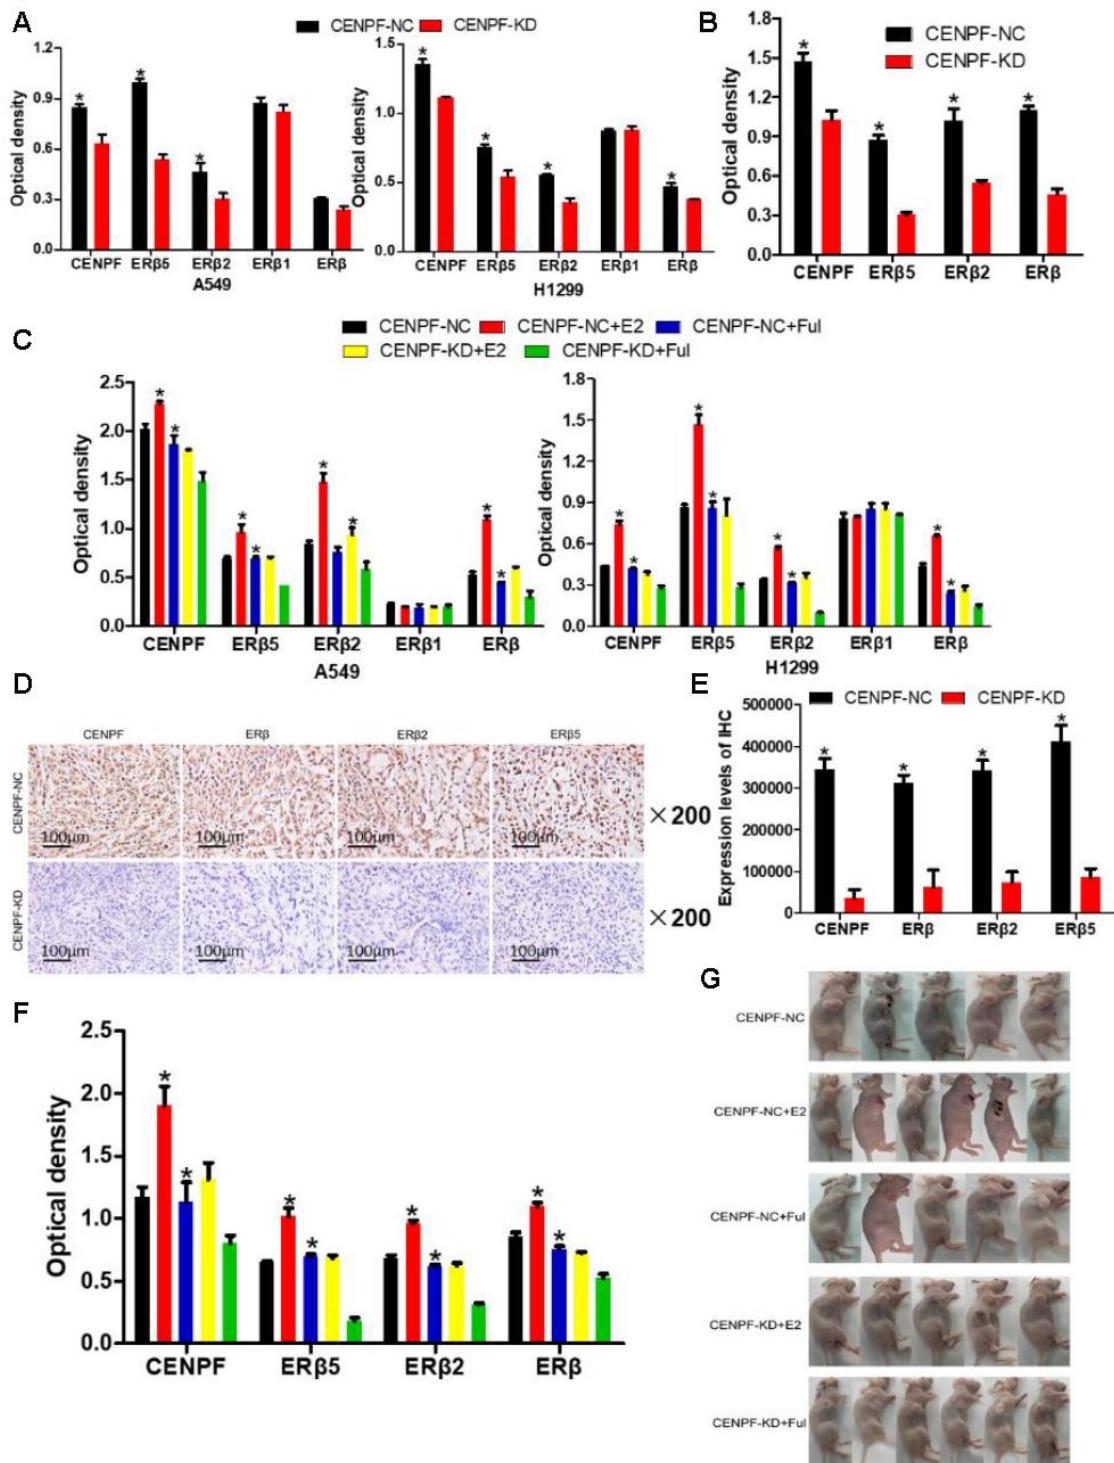

**Supplementary Figure 5. Knockdown of CENPF can inhibit the expression of ERβ2/5 *in vitro* and *in vivo*.** (A, B) Corresponding gray value analysis showed that knockdown of CENPF inhibited the expression of ERβ2/5 *in vitro* and *in vivo* experiment. (C) Corresponding gray value analysis of CENPF, ERβ, ERβ1, ERβ2 and ERβ5 *in vitro* experiment after treated with E2 and Ful treatment. (D, E) Immunohistochemical analysis of CENPF, ERβ, ERβ2 and ERβ5 expression in nude mice tumor tissues and corresponding quantitative histograms. \*P < 0.05. (F) Corresponding gray value analysis of CENPF, ERβ, ERβ1, ERβ2 and ERβ5 *in vivo* experiment after treated with E2 and Ful treatment. (G) Pictures of nude mice sacrificed at 45 days. \*P < 0.05. P values were calculated with two-tailed unpaired Student's t-test, or one-way analysis of variance.
